# Supplementary material
Source: PubMed Central journal article supplement (PMC8139715)

## Supplemental Information

### **The S1/S2 site containing PRRA affects cellular tropism of SARS-CoV-2 and ACE2 usage by the closely related Bat RaTG13**

Shufeng Liu<sup>1</sup>, Prabhuanand Selvaraj<sup>1</sup>, Christopher Z. Lien<sup>1</sup>, Ivette, A. Nunez<sup>1</sup>, Wells W. Wu<sup>2</sup>,  
Chao-Kai Chou<sup>2</sup>, Tony T. Wang<sup>1, \*</sup>

<sup>1</sup>Laboratory of Vector-Borne Viral Diseases, Division of Viral Products, Center for Biologics Evaluation, U.S. Food and Drug Administration, Silver Spring, Maryland, United States of America.

<sup>2</sup> Facility for Biotechnology Resources, Center for Biologics Evaluation and Research, US Food and Drug Administration, Silver Spring, Maryland, United States of America.

\* Correspondence: [Tony.Wang@fda.hhs.gov](mailto:Tony.Wang@fda.hhs.gov)

## Supplemental Methods

### Protein sequences used in this study

#### SARS-CoV-2 Spike Protein

MFVFLVLLPLVSSQCVNLTTRTQLPPAYTNSFTRGVYYPDKVFRSSVLHSTQDLFLPFFS  
NVTWFHAIHVSQTNGTKRFDNPVLPFNDGVYFASTEKSNIIRGWIFGTTLDSKTQSLLIV  
NNATNVVIKVCFEFQFCNDPFLGVYYHKNNKSWMESEFRVYSSANNCTFEYVSQPFLMD  
LEGKQGNFKNLREFVFKNIDGYFKIYSKHTPINLVRDLPPGFSALEPLVDLPIGINITRFQT  
LLALHRSYLTSGDSSSGWTAGAAAYYVGYLQPRTFLLKYNENGTITDAVDCALDPLSET  
KCTLKSFTVEKGIYQTSNFRVQPTESIVRFPNITNLCPFGEVFNATRFASVYAWNRKRISN  
CVADYSVLYNSASFSTFKCYGVSPTKLNLDLCTNVYADSFVIRGDEVQRQIAPGQTGKIA  
DYNKLPDDFTGCVIAWNSNNLDSKVGNYNYLYRFRKSNLKPFERDISTEYIYQAGST  
PCNGVEGFNCYFPLQSYGFQPTNGVGYQPYRVVLSFELLHAPATVCGPKKSTNLVKN  
KCVNFNENGLTGTGVLTESNKKFLPFQQFGRDIADTTDAVRDPQTLEILDITPCSFGGVS  
VITPGTNTSNQVAVLYQDVNCTEVPVAIHADQLTPTWRVYSTGNSVVFQTRAGCLIGAEH  
VNNSYECDIPIGAGICASYQTQTNSPRRARSVASQSIAYTMSLGAENSVAYSNNNSIAIPT  
NFTISVTTEILPVSMTKTSVDCTMYICGDSTECSNLLQYGSFCTQLNRALTGIAVEQDK  
NTQEVFAQVKQIYKTPPIKDFGGFNFSQILPDPSKPSKRSFIEDLLFNKVTLADAGFIKQY  
GDCLGDIAARDLCAQKFNGLTVLPPLLTDEMIAQYTSALLAGTITSGWTFGAGAALQIP  
FAMQMAYRFNGIGVTQNVLYENQKLIANQFNSAIGKIQDLSSTASALGKLQDVVNQN  
AQALNTLVKQLSSNFGAISSVLNDILSRLDKVEAEVQIDRLITGRLQSLQTYVTQQLIRAA  
EIRASANLAATKMSECVLQSKRVDVFCGKGYHLMSFPQSAPHGVVFLHVTVYVPAQEK  
FTTAPAICHGKAHFPREGVFSVNGTHWFVTQRNFYEPQIITDNTFVSGNCDVVIGIVN  
NTVYDPLQPELDSFKEELDKYFKNHTSPDVDLGDISGINASVVNIQKEIDRLNEVAKNLN  
ESLIDLQELGKYEYIKWPWYIWLGFIAGLIAIVMVTIMLCCMTSCCCLKGCCSCGCC  
KFDEDDSEPVKGVKLYHT

#### Bat RaTG13 Spike Protein

MFVFLVLLPLVSSQCVNLTTRTQLPPAYTNSSTRGVYYPDKVFRSSVLHSTQDLFLPFFS  
NVTWFHAIHVSQTNGIKRFDNPVLPFNDGVYFASTEKSNIIRGWIFGTTLDSKTQSLLIVN  
NATNVVIKVCFEFQFCNDPFLGVYYHKNNKSWMESEFRVYSSANNCTFEYVSQPFLMDL  
EGKQGNFKNLREFVFKNIDGYFKIYSKHTPINLVRDLPPGFSALEPLVDLPIGINITRFQTL  
LALHRSYLTSGDSSSGWTAGAAAYYVGYLQPRTFLLKYNENGTITDAVDCALDPLSETK  
CTLKSFTVEKGIYQTSNFRVQPTDSIVRFPNITNLCPFGEVFNATTFASVYAWNRKRISNC  
VADYSVLYNSTSFSTFKCYGVSPTKLNLDLCTNVYADSFVITGDEVQRQIAPGQTGKIADY  
NYKLPDDFTGCVIAWNSKHIDAKEGGNFNYLYRFRKANLKPFERDISTEYIYQAGSKPC  
NGQTGLNCYYPYRYGFYPTDGVGHQPYRVVLSFELLNAPATVCGPKKSTNLVKNKC  
VNFNENGLTGTGVLTESNKKFLPFQQFGRDIADTTDAVRDPQTLEILDITPCSFGGVS  
VITPGTNTSNQVAVLYQDVNCTEVPVAIHADQLTPTWRVYSTGNSVVFQTRAGCLIGAEHVN  
NSYECDIPIGAGICASYQTQTNSRVSASQSIAYTMSLGAENSVAYSNNNSIAIPTNFTISVTT  
EILPVSMTKTSVDCTMYICGDSTECSNLLQYGSFCTQLNRALTGIAVEQDKNTQEVFAQ

VKQIYKTPPIKDFGGFNFSQILPDPSKPSKRSFIEDLLFNKVTLADAGFIKQYGDCLGDIAA  
RDLICAQKFNGLTVLPPLLDEMIAQYTSALLAGTITSGWTFGAGAALQIPFAMQMAYR  
FNGIGVTQNVLYENQKLIANQFNSAIGKIQDSLSTASALGKLQDVVNQNAQALNTLVK  
QLSSNFGAISSVLNDILSRLDKVEAEVQIDRLITGRLQSLQTYVTQQLIRAAEIRASANLA  
ATKMSECVLGQSKRVDFCGKGYHLMSFPQSAPHGVVFLHVTVPAQEKNFTTAPAICH  
DGKAHFPREGVFVSNGTHWFVTQRNFYEPQIITDNTFVSGSCDVVIGIVNNTVYDPLQP  
ELDSFKEELDKYFKNHTSPDVDLGDISGINASVVNIQKEIDRLNEVAKNLNESLIDLQELG  
KYEQYIKWPWYIWLGFIAGLIAIIMVTIMLCCMTSCCCLKGCCSCGSCCKFDEDDSEPV  
LKGVKLHYT

### Pangolin Spike Protein

MFVFLFVLPLVSSQCVNLTTRTGIPPGYTNSSSTRGVYYPDKVFRSSILHLTQDLFLPFFSN  
VTWFNTINYQGGFKKFDNPVLPFNDGVYFASTEKSNIIRGWIFGTTLDARTQSLNINA  
TNVVIKVECFQCTDPFLGVYHNNKTVWENEFVYSSANNCTFEYISQPFLMDLEGK  
QGNFKNLREFVFNVDGYFKIYSKHTPIDLVRDLPRGFAALEPLVDLPIGINITRFQTLA  
LHRSYLTPGNLESGWTTGAAAYVGYLQQRFTLLSYNQNGTITDAVDCSLDPLSETKCT  
LKSLTVEKGIYQTSNFRVQPTISIVRFPNITNLCPFGEVFNASKFASVYAWNRKRISNCVA  
DYSVLYNSTSFSTFKCYGVSPTKLNLCFTNVYADSFVVKGDEVQRQIAPGQTGVIADYN  
YKLPDDFTGCVIAWNSVKQDALTTGGNYGYLYRFRKSKLKPFERDISTEYQAGSTPCN  
GQVGLNCYYPLERYGFHPTTGVDNYQPFVVLSEFLLNGPATVCGPKLSTTLVKDKCV  
NFNFNGLTGTGVLTTSKKQFLPFQFGRDISDITDAVRDPQTLEILDITPCSFVGGVSVITP  
GTNTSNQVAVLYQDVNCTEVPMAIHAEQLTPAWRVYSAGANVFQTRAGCLVGAEHVN  
NSYECDIPVGAGICASYHSMSSLRVSNQRSIIAYTMSLGAENSVAYSNNIAIPTNFTISVT  
TEILPVSMTKTSVDCTMYICGDSIECSNLLQYGSFCTQLNRALTGIAVEQDKNTQEVFA  
QVKQIYKTPPIKDFGGFNFSQILPDPSKPSKRSFIEDLLFNKVTLADAGFIKQYGDCLGDIA  
ARDLICAQKFNGLTVLPPLLDEMIAQYTSALLAGTITSGWTFGAGAALQIPFAMQMAY  
RFNGIGVTQNVLYENQKLIANQFNSAIGKIQDSLSTASALGKLQDVVNQNAQALNTLV  
KQLSSNFGAISSVLNDILSRLDKVEAEVQIDRLITGRLQSLQTYVTQQLIRAAEIRASANL  
AATKMSECVLGQSKRVDFCGKGYHLMSFPQSAPHGVVFLHVTVPAQEKNFTTAPAIC  
HEGKAHFPREGVFVSNGTHWFITQRNFYEPQIITDNTFVSGSCDVVIGIVNNTVYDPLQ  
PELDSFKEELDKYFKNHTSPDVDLGDISGINASVVNIQKEIDRLNEVAKNLNESPIDLQEL  
GKYEQYIKWPWYIWLGFIAGLIAIIMVTIMLCCMTSCCCLKGCCSCGSCCKFDEDDSEP  
VLKGVKLHYT

### Intermediate horseshoe bat (*Rhinolophus affinis*) ACE2

MSGSSWLLLSLVAVTTAQSTTEDEAKMFLDKFNKAEDLSHQSSLASWDYNTNINDEN  
VQKMDEAGAKWSAFYEEQSKLAKNYSLEQIQNVTVKLQLQILQQSGSPVLSEDKSKRL  
NSILNAMSTIYSTGKVCKPNKPQECLLLEPGLDNIMGTSKDYNERLWAWEGWRAEVGK  
QLRPLYEEYVVLKNEMARGYHYEDYGDYWRDYETEESPGPGYSRDQLMKDVERIFT  
EIKPLYEHLHAYVRAKLMDTYPFHISPTGCLPAHLLGDMWGRFWTNLYPLTVPFGQKP

NIDVTDEMLKQGWDADRIFKEAEKFFVSVGLPNMTEGFWNNSMLTEPGDGRKVVCHP  
TAWDLGKGFRIKMCTKVTMEDFLTAHHEMGHIQYDMAYASQPYLLRNGANEGFHEA  
VGEVMSLSVATPKHLKTMGLLSPDFREDNETEINFLKQALNIVGTLPFTYMLEKWRW  
MVFKGEIPKEEWMKKWWEMKRKIVGVVEPVPHDETYCDPASLFHVANDYSFIRYYTR  
TIFEFQFHEALCRIAQHGDGPLHKCDISNSTDAGKLLHQMLSVGKSQAWTKTLEDIVDSR  
NMDVGPLLKYFEPLYTWLQEQNRKSYVGWNTDWSPYSDQSIKVRISLKSALGENAYE  
WNDNEMYLFRSSVAYAMREYFLKEKHQILFGAENVVWSNLKPRISFNHVTSPGNLS  
DIIPRPEVEGAIRMSRSRINDAFRLDDNSLEFLGIQPTLGPPYQPPVTIWLIVFGVVMVAVV  
VVGIVVLIITGIRDRRKTQARSEENPYSSVDLSKGENNPGFQNGDDVQTSF

#### Syrian Hamster ACE2

MSSSSWLLLSLVAVTTAQSIIIEQAKTFLDKFNQEAEDLSYQSALASWNYNTNITEENAQ  
KMNEAAAKWSAFYEEQSKLAKNYSLQEVQNLTIKRLQALQQSGSSALSADKNKQLN  
TILNTMSTIYSTGKVCNPKNPQECLLLEPGLDDIMATSTDYNERLWAWEGWRAEVBGKQ  
LRPLYEEYVVLKNEMARANNYEDYGDYWRGDYEAEGADGYNYNGNQLIEDVERTFK  
EIKPLYEQLHAYVRTKLMNTYPSYISPTGCLPAHLLGDMWGRFWTNLYPLTVPFQKPN  
IDVTDAMVNQGWNAERIFKEAEKFFVSVGLPYMTQGFWENSMLTDPGDDRKVVCHPT  
AWDLGKGFRIKMCTKVTMDNFLTAHHEMGHIQYDMAYATQPFLRNGANEGFHEA  
VGEIMSLSAATPEHLKSIGLLPSDFQEDNETEINFLKQALTIVGTLPFTYMLEKWRWMV  
FKGDIPKEQWMEKWWEMKREIVGVVEPLPHDETYCDPAALFHVSNDSYFIRYYTRTIY  
QFQFQEALCQAAKHGDGPLHKCDISNSTEAGQKLLNMLRLGKSEPWTLAENVVGARN  
MDVRPLLNYFEPLSVWLKEQNKNSFVGWNTDWSPYADQSIKVRISLKSALGENAYEWD  
DNEMYLFRASVAYAMRVYFAKNKTQTVPFQVEDIRVSDLKPRVSFNFFVTSPQNVSDII  
PRNEVEEAURLSRGRINDVFGLDNSLEFLGINPTLSPPYQPPVTIWLIIFGVVMGIVVGI  
IILIFTGIKGRKKKNETKREENPYDSVDIGKGESNAGFLSNDDAQTSTF

#### Mouse ACE2

MSSSSWLLLSLVAVTTAQLTEENAKTFLNPNQEAEDLSYQSSLASWNYNTNITEENA  
QKMSEAAAKWSAFYEEQSKTAQSFSLQEIQTPIIKRQLQALQQSGSSALSADKNKQLNTI  
LNTMSTIYSTGKVCNPKNPQECLLLEPGLDEIMATSTDYNSRLWAWEGWRAEVBGKQLR  
PLYEEYVVLKNEMARANNYNDYGDYWRGDYEAEGADGYNYNRNQLIEDVERTFAEIK  
PLYEHLHAYVRRKLMNTYPSYISPTGCLPAHLLGDMWGRFWTNLYPLTVPFAQKPNID  
VTDAMMNQGWDAERIFQEAKEKFFVSVGLPHMTQGFWANSMLTEPADGRKVVCHPTA  
WDLGHGDFRIKMCTKVTMDNFLTAHHEMGHIQYDMAYARQPFLRNGANEGFHEAV  
GEIMSLSAATPKHLKSIGLLPSDFQEDSETEINFLKQALTIVGTLPFTYMLEKWRWMV  
RGEIPKEQWMEKWWEMKREIVGVVEPLPHDETYCDPASLFHVSNDSYFIRYYTRTIYQF  
QFQEALCQAAKYNGSLHKCDISNSTEAGQKLLKMLSLGNSEPWTKALENVVGARNMD  
VKPLLNYFQPLFDWLKEQNRNSFVGWNTWSPYADQSIKVRISLKSALGANAYEWTNN  
EMFLFRSSVAYAMRKYFSIKNQTVPFLEEDVRVSDLKPRVSFYFFVTSPQNVSDVIPRSE

VEDAIRMSRGRINDVFGLNDNSLEFLGIHPTLEPPYQPPVTIWLIIFGVVMALVVVGIIILIV  
TGIKGRKKKNETKREENPYDSMDIGKGESNAGFQNSDDAQTSE

Pig ACE2

MSGSFWLLLSLIPVTAQAQSTTEELAKTFLEKFNLEAEDLAYQSSLASWTINTNITDENIQK  
MNDARAKWSAFYEEQSRIAKTYPLDEIQTLLKRLQALQQSGTSGLSADKSKRLNTILN  
TMSTIYSSGKVLDPNNPQECLVLEPGLDEIMENSKDYSRRLWAWESWRAEVBKQLRPL  
YEEYVVLNEMARANNYEDYGDYWRGDYEVTGTGDYDYSRNQLMEDVERTFAEIKPL  
YEHLHAYVRAKLMDAYPSRISPTGCLPAHLLGDMWGRFWTNLYPLTVPFGEKPSIDVT  
EAMVNQSWDAIRIFEEAEKFFVSIKLPNMTQGFWNNSMLTEPGDGRKVVCHPTAWDLG  
KGDRIKMTKVTMDDFLTAHHEMGHIQYDMAYAIQPYLLRNGANEGFHEAVGEIMSL  
SAATPHYLKALGLLPPDFYEDSETEINFLKQALTIIVGTLPTFTYMLEKWRWMVFKGEIPK  
EQWMQKWWEMKREIVGVVEPLPHDETYCDPAALFHVAEDYSFIRYYTRTIYQFQFHEA  
LCRTAKHEGPLYKCDISNSTEAGQKLLQMLSLGKSEPWTALLENIVGVKTMDEVKPLLSY  
FEPLLTWLKAQNGNSSVGWNTDWTYPADQSIKVRISLKSALGEDAYEWNENEMYLFRS  
SIAYAMRNYFSSAKNETIPFGAVDVVWVSDLKPRISFNFFVTSPANMSDIIPRSDVEKAISM  
SRSRINDAFRLDDNTLEFLGIQPTLGPPEPPVTVWLIIFGVVMGLVVVGIVVLIFTGIRDR  
RKKKQASSEENPYGSMDLSKGESNSGFQNGDDIQTSE

Chinese hamster ACE2

MSSSSWLLLSLVAVTTAQSIIIEQAKTFLDKFNQEAEDLSYQSALASWNYNTNITEENAQ  
KMNEAAAKWSAFYEEQSKLAKNYSLQEVQNLIKRQLQALQQSGSSALSADKNKQLNT  
ILNTMSTIYSTGKVCNPKNPQECLLLEPGLDDIMATSTDYNERLWAWEGWRAEVBKQL  
RPLYEEYVVLKNEMARANNYKDYGDYWRGDYEAEGADGYNNGNQLIEDVERTFKEI  
KPLYEQLHAYVRTKLMDTYPSFISPTGCLPAHLLGDMWGRFWTNLYPLTVPFQKPNID  
VTDAMVNQGWDAERIFKEAEKFFVSVGLPHMTQGFVWNSMLTDPGDDRKVVCHPTA  
WDLGKGDRIKMTKVTMDNFLTAAHHEMGHIQYDMAYATQPFLRNGANEGFHEAV  
GEIMSLSAATPKHLKSIKLLPSNFHEDNETEINFLKQALTIIVGTLPTFTYMLEKWRWMV  
KGDIPKEKWMKWWEMKREIVGVVEPLPHDETYCDPAALFHVSNDYSFIRYYTRTIYQ  
FQFQEALCQAAKHGDLHKCDISNSTEAGQKLLNMLRLGKSEPWTALENVVGARNM  
DVRPLLNYFEPLSVWLKEQNKNSFVGWNTDWSPYADQSIKVRISLKSALGENAYEWN  
NEMYLFRATVAYAMRVYFAKNKTQTVLFGVEDIRVSDLKPRVSNFFVTSPQNVSDIIP  
RNEVEEA VRFSRGRINDVFGLDDNSLEFLGINPTLAPPYQPPVTIWLIIFGVVMGIVVGI  
VILIVTGIRARKKNEAKREENPYDSVDIGKGESNAGFQNSDDVQTSF

Ferret ACE2

MLGSSWLLLSLAALTAQAQSTTEDLAKTFLEKFNIEAEELSYQNSLASWNYNTNITDENI  
QKMNIAGAKWSAFYEEESQHAHTYPLEEIQDPIIKRQLRALQQSGSSVLSADKRERLNTI

LNAMSTIYSTGKACNPNNPQECLLLEPGLDDIMENSKDYNERLWAWEGWRSEVVGKQLR  
PLYEEYVALKNEMARANNYEDYGDYWRGDYEEEWADGYSYSRNQLIEDVEHTFTQIK  
PLYEHLHAYVRAKLMDAYPSRISPTGCLPAHLLGDMWGRFWTNLYPLMVPFRQKPNID  
VTDAMVNSQSWDARRIFEEAETFFVSVGLPNMTEGFWQNSMLTEPGDNRKVVCHPTAW  
DLGKRDFRIKMCTKVTMDDFLTAHHEMGHIQYDMAYAEQPFLLRNGANEGFHEAVGEI  
MSLSAATPNHLKNIGLLPPDFSEDSETDINFLKQALTIVGTLPTFTYMLEKWRWMVFKG  
EIPKEQWMQKWWEMKRDIVGVVEPLPHDETYCDPAALFHVANDYSFIRYYTRTIYQFQ  
FQEALCQIAKHEGPLYKCDISNSSEAGQKLHEMLSLGRSKPWTFALERVVGAKTMDVR  
PLLNYFEPLFTWLKEQNRNSFVGVWNTDWSPYADQSIKVRISLKSALGEKAYEWNDEM  
YFFQSSIAYAMREYFSKVKNTIPFVGKDVRSVLKPRISFNFIVTSPENMSDIIPRADVEE  
AIRKSRGRINDAFRLDDNSLEFLGIQPTLEPPYQPPVTIWLIVFGVVMGVVVVGIFLLIFSG  
IRNRRKNNQARSEENPYASVDLSKGENNPGFQNVDDVQTSF

Bovine ACE2

MTGSFWLLLSLVAVTAAQSTTEEQAKTFLEKFNHEAEDLSYQSSLASWNYNTNITDENV  
QKMNEARAKWSAFYEEQSRMAKTYSLLEIQNLTLKRQLKALQHSQTSALSAEKSKRLN  
TILNKMSTIYSTGKVLDPNTQECLALEPGLDDIMENSRDYNRRLLWAWEGWRAEVGKQL  
RPLYEEYVVLNEMARANNYEDYGDYWRGDYEVGTGAGDYDYSRDQLMKDVERTFAE  
IKPLYEQLHAYVRAKLMHTYPSYISPTGCLPAHLLGDMWGRFWTNLYSLTVPFEHKPSI  
DVTEKMENQSWDAERIFKEAEKFFVSISLPYMTQGFWDNSMLTEPGDGRKVVCHPTAW  
DLGKGDRIKMCTKVTMDDFLTAHHEMGHIQYDMAYAAQPYLLRNGANEGFHEAVGE  
IMLSAATPHYLKALGLLAPDFHEDNETEINFLKQALTIVGTLPTFTYMLEKWRWMVFK  
GEIPKQQWMEKWWEMKREIVGVVEPLPHDETYCDPAACLFHVAEDYSFIRYYTRTIYQF  
QFHEALCKTAKHEGALFKCDISNSTEAGQRLQLMLRLGKSEPWTLALENIVGIKTMQV  
PLLNYFEPLFTWLKEQNRNSFVGVWSTEWTPYSDQSIKVRISLKSALGENAYEWNDEM  
YLFQSSVAYAMRKYFSEARNETVLFGEDNVWVSDKKPRISFKFFVTSPNNVSDIIPRTEV  
ENAIRLSRDRFNDVFQLDDNSLEFLGIQPTLGPPYEPPTIWLIIIFGVVMGVVVIGIVVLIF  
TGIRNRRKKNQASSEENPYGSVDLNLKGENNSGFQNIIDVQTSL

Grivet (African green monkey) ACE2

MSSSSWLLLSLVAVTAAQSTIEEQAKTFLDKFNHEAEDLFYQSSLASWNYNTNITEENV  
QNMNNAAGEKWSAFLKEQSTLAQMYPLQAIQNLTVKLQLQALQQNGSSVLSEDKSKRL  
NTILNTMSTIHSTGKVCNPNNPQECLLLDPGLNEIMEKSLDYNERLWAWEGWRSEVVGK  
QLRPLYEEYVVLKNEMARANHYKDYGDYWRGDYEVNGVDGYDYNRDQLIEDVERTF  
EEIKPLYEHLHAYVRAKLMNAYPSYISPTGCLPAHLLGDMWGRFWTNLYSLTVPFGQK  
PNIDVTDAMVNQAWNAQRIFKEAEKFFVSVGLPNMTQGFWENSMLTDPGNVQKVVCH  
PTAWDLGKGDRIIMCTKVTMDDFLTAHHEMGHIQYDMAYAAQPFLLRNGANEGFHE  
AVGEIMLSAATPKHLKSIGLLSPDFQEDNETEINFLKQALTIVGTLPTFTYMLEKWRWM  
VFKGEIPKDQWMKKWWEMKREIVGVVEPVPHDETYCDPASLFHVSNDYSFIRYYTRTL  
YQFQFQEALCQAAKHEGPLHKCDISNSTEAGQKLLNMLKLGKSEPWTLALENVVGAKN

MSVRPLLNYFEPLFTWLKDQNKNSFVGWSTDWSPYADQSIKVRISLKSALGANAYKWN  
DNEMYLFRSSVAYAMRQYFLENKHQTLFGEEDVRVADLKPRISFNFYVTAPKNVSDIIP  
RTEVEEAIRFSRSRINDAFQLNDNSLEFLGIQSTLVPPYQSPITTLIVFGVVMVAVIVAGIV  
VLIFTGIRDRKKNQARSEENPYASIDISKGENNPGFQNTDDVQTSF

Malayan pangolin ACE2

MSGSSWLLLSLVAVTAAQSTSDEEAKTFLEKFNSEAEELSYQSSLASWNYNTNITDENV  
QKMNVAGAKWSTFYEEQSKIAKNYQLQNIQNDTIKRQLQALQLSGSSALSADKNQRLN  
TILNTMSTIYSTGKVCNPGNPQECSLLEPGLDNIMESSKDYNRLWAWEGWRSEVVGKQL  
RPLYEEYVVLKNEMARANHYEDYGDYWRGDYEAEGANGYNYSRDHLIEDVEHIFTQI  
KPLYEHLHAYVRAKLMDNYPHISPTGCLPAHLLGDMWGRFWTNLYPLTVPFRQKPN  
DVTDAMVNQTDANRIFKEAEKFFVSVGLPKMTQTFWENSMLTEPGDGRKVVCHPTA  
WDLGKHDFRIKMCTKVTMDDFLTAHHEMGHIQYDMAYAMQPYLLRNGANEGFHEAV  
GEIMSLSAATPKHLKNIGLLPPDFYEDNETEINFLKQALTIVGTLPTFTYMLEKWRWMVF  
SGQIPKEQWMKKWWEMKREIVGVVEPVPHDETYCDPASLFHVANDYSFIRYYTRTIYQ  
FQFQEALCQTAKHEGPLHKCDISNSAEAGQKLLQMLSLGKSKPWTLALERVVGTKNMD  
VRPLLNYFEPLLTWLKEQNKNSFVGWNTDWSPYAAQSIKVRISLKSALGEKAYEWNDS  
EMYLFRSSVAYAMREYFSKVKKQTIPFEDECVRVSDLKPRVSFIFVTLVKNVSAVIPRA  
EVEEAIRISRSRINDAFRLDDNSLEFLGIQPTLQPPYQPPVTIWLIVFGVVMGVVVVGIVV  
LIFTGIRDRKKNQARSEQNPYASVDLSKGENNPGFQNVDDVQTSF

## Supplemental Figures and Legends

**Figure S1.** Protease repertoires in Calu-3 and Caco-2. Calu-3 and Caco-2 cells were infected with SARS-CoV-2 USA/WA1-2020 at MOI of 0.1 for 4, 24, and 48 hours. RNA was isolated from uninfected and infected cells were subject to mRNA-Seq. Reads per kilobase per million mapped reads (RPKM) was calculated to show expression level of proteases that may cleave SARS-CoV-2 spike protein at the S1/S2 site. Also refer to Table S1.

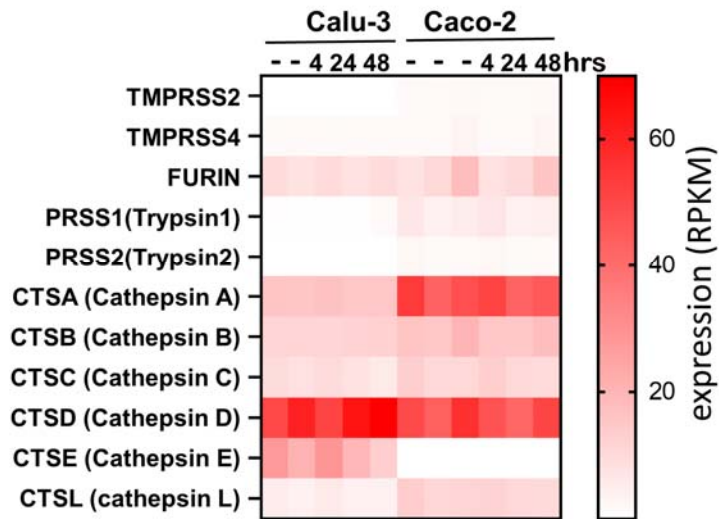

Supplement: JVI.01751-20-s0001.pdf [file JVI.01751-20-s0001.pdf]
